# Supplementary material for: Artificial intelligence guided search for van der Waals materials with high optical anisotropy
Source: Royal Society of Chemistry journal article supplement (doi:10.1039/d4mh01332h), 2024-12-20
Supplement: d4mh01332h2.xlsx [file d4mh01332h2.xlsx]

## Sheet: Sheet1
Formula	a, Å	b, Å	c, Å	alpha	beta	gamma	Spacegroup symbol	Element	x	y	z
As8Se8Si8	4.99	10.06	13.05	90	90	90	Pnna	Si	0.25	0	0.77
								Si	0.3	0.25	0.25
								As	0.07	0.41	0.14
								Se	0.94	0.85	0.12
Ba2Cr18S18	8.59	8.59	12.19	90	90	120	P6_3/m	Ba	0.67	0.33	0.25
								Cr	0.97	0.83	0.25
								Cr	0.97	0.82	0.92
								S	0.28	0.94	0.25
								S	0.28	0.94	0.92
In3PPt3S6	7.52	7.52	5.17	90	90	120	P-3m1	In	0	0	0
								In	0.33	0.67	0.63
								Pt	0.5	0.5	0
								S	0.82	0.63	0.77
Si4Ta8Te16	7.92	6.38	16.26	74.33	90	90	P2_1/c	Ta	0.04	0.65	0.25
								Ta	0.79	0.85	0.75
								Si	0.63	0.25	0.75
								Te	0.98	0.89	0.37
								Te	0.76	0.61	0.13
								Te	0.48	0.94	0.37
								Te	0.26	0.56	0.13
Cr3La1S6	6.08	6.08	6.91	98.47	98.47	120.05	C2/m	La	0	0	0.5
								Cr	0.84	0.16	0
								Cr	0.5	0.5	0
								S	0.24	0.24	0.2
								S	0.9	0.56	0.2
Cu10Rb4Se10	9.72	9.72	9.72	126.86	126.86	78.47	I4/m	Rb	0.37	0.81	0.18
								Cu	0.95	0.65	0.1
								Cu	0.75	0.25	0.5
								Se	0.95	0.55	0.8
								Se	0.35	0.35	1
Al4Ga4S12	3.6	9.96	11.98	90	90	90	Pnma	Al	0.25	0.4	0.61
								Ga	0.75	0.27	0.8
								S	0.25	0.93	0.1
								S	0.75	0.09	0.32
								S	0.25	0.26	0.11
P4Sb4Se16	7.32	9.96	13.18	59.86	90	90	P2_1/c	Sb	0.36	0.58	0.83
								P	0.27	0.69	0.05
								Se	0.22	0.43	0.6
								Se	0.2	0.84	0.35
								Se	0.49	0.75	0.6
								Se	0.01	0.71	0.66
Mn3S3Sn3	5.56	5.56	5.56	58.13	58.13	58.13	R-3m	Mn	0.5	0	0
								Sn	0.5	0.5	0.5
								Sn	0	0	0
								S	0.72	0.72	0.72
Nb4Ni6Se16	3.5	10.71	14.95	90	90	90	Pbam	Nb	0.5	0.2	0.12
								Ni	0	0.36	0.23
								Ni	0	0	0
								Se	0	0.98	0.84
								Se	0.5	0.74	0.21
								Se	0	0.72	0.51
								Se	0.5	0.56	0.87
As12Rb4Si12	3.73	10.14	20.37	90	90	90	Pbam	Rb	0	0.29	0.31
								Si	0.5	0.41	0.03
								Si	0	0.11	0.01
								Si	0	0.18	0.13
								As	0.5	0.1	0.19
								As	0.5	0.28	0.46
								As	0	0.41	0.11
As12Na4Si12	3.68	10.09	18.29	90	90	90	Pbam	Na	0	0.32	0.3
								Si	0.5	0.41	0.04
								Si	0	0.11	0.02
								Si	0	0.17	0.14
								As	0.5	0.1	0.21
								As	0.5	0.28	0.45
								As	0	0.41	0.12
Co8K4Se16	6.02	7.01	16	90	90	90	Pmmn	K	0.38	0	0
								K	0.03	0	0.5
								Co	0.01	0	0.25
								Co	0.5	0.25	0.25
								Se	0.84	0.25	0.33
								Se	0.67	0	0.17
								Se	0.35	0	0.33
As5Te8	7.69	7.69	14	70.58	70.58	29.93	C2/m	Te	0.61	0.61	0.31
								Te	0.92	0.92	0.55
								Te	0.23	0.23	0.79
								Te	0.96	0.96	0.83
								As	0.49	0.49	0
								As	0.81	0.81	0.24
								As	0.13	0.13	0.46
Mo2Ni4Te6	3.62	7.85	10.45	69.28	90	90	P2_1/m	Ni	0.25	0.41	0.09
								Ni	0.75	0.04	0.56
								Te	0.75	0.93	0.82
								Te	0.75	0.58	0.16
								Te	0.25	0.28	0.49
								Mo	0.25	0.78	0.7
Al4Ga2Te6	3.15	12.09	12.44	118.46	90	97.49	Cm	Al	0.58	0.15	0.04
								Al	0.26	0.52	0.39
								Al	0.18	0.36	0.44
								Al	0.77	0.54	0.56
								Ga	0.75	0.5	0.77
								Ga	0.47	0.94	0.87
								Te	0.16	0.31	0.21
								Te	0.84	0.69	0.46
								Te	0.6	0.2	0.26
								Te	0.37	0.75	0.62
								Te	0.16	0.33	0.6
								Te	0.86	0.72	0.77
Al4Ta8Te16	8.17	6.52	15.98	73.72	90	90	P2_1/c	Ta	0.03	0.65	0.25
								Ta	0.79	0.85	0.75
								Al	0.63	0.25	0.75
								Te	0.99	0.89	0.37
								Te	0.76	0.61	0.13
								Te	0.49	0.95	0.37
								Te	0.26	0.55	0.13
Cs4Lu12Te20	4.36	13.05	23.59	90	90	90	Pnma	Cs	0.25	0.36	0.09
								Lu	0.25	0.45	0.7
								Lu	0.25	0.8	0.68
								Lu	0.25	0.39	0.44
								Te	0.25	0.44	0.57
								Te	0.25	0.77	0.55
								Te	0.25	0.8	0.8
								Te	0.25	0.45	0.82
								Te	0.25	0.38	0.31
Cs4Pb2Te4	9.83	9.83	9.83	129.47	72.09	132.21	Ibam	Cs	0.36	0.83	0.19
								Te	0.89	0.21	0.09
								Pb	0.25	0.25	0
Al4Ga4S12	3.6	9.96	11.98	90	90	90	Pnma	Al	0.25	0.4	0.61
								Ga	0.75	0.27	0.8
								S	0.25	0.93	0.1
								S	0.75	0.09	0.32
								S	0.25	0.26	0.11
Al8Bi4Te16	8.5	8.5	13.63	90	90	90	P4/nnc	Al	0.5	0	0.75
								Al	0	0.5	0
								Bi	0	0	0.12
								Te	0.67	0.83	0.88
Np4S8	7.11	4.1	10.59	90.01	115.98	90	P2_1/m	Np	0.71	0.25	0.19
								S	0.43	0.75	0.1
								S	0.07	0.25	0.16
Na4Pt8S12	7.19	7.19	11.4	90	90	120	P6_3mc	Na	0.33	0.67	0.3
								Na	0	0	0.7
								Pt	0.83	0.17	0.01
								Pt	0.67	0.33	0.5
								S	0.5	0.5	0.6
								S	0.16	0.84	0.9
