# Supplementary material for: Artificial intelligence guided search for van der Waals materials with high optical anisotropy
Source: Royal Society of Chemistry journal article supplement (doi:10.1039/d4mh01332h), 2024-12-20
Supplement: d4mh01332h3.xlsx [file d4mh01332h3.xlsx]

## Sheet: Sheet1
Formula	a, Å	b, Å	c, Å	alpha	beta	gamma	Spacegroup symbol	Element	x	y	z
HfS3	5.07	3.59	9.03	90	97.2	90	P2_1/m	Hf	0.28	0.25	0.65
								S	0.76	0.25	0.55
								S	0.47	0.25	0.17
								S	0.88	0.25	0.17
HfSe3	5.39	3.72	9.43	90	97.78	90	P2_1/m	Hf	0.71	0.25	0.66
								Se	0.24	0.25	0.55
								Se	0.55	0.25	0.17
								Se	0.11	0.25	0.17
SiAs	15.98	3.67	9.53	90	106	90	C2/m	As	0.16	0.5	0.17
								As	0.46	0.5	0.18
								As	0.35	0	0.45
								Si	0.26	0	0.21
								Si	0.37	0	0.08
								Si	0.43	0.5	0.41
SiP	15.98	3.67	9.53	90	106	90	C2/m	P	0.16	0.5	0.17
								P	0.46	0.5	0.18
								P	0.35	0	0.45
								Si	0.26	0	0.21
								Si	0.37	0	0.08
								Si	0.43	0.5	0.41
MoTe2	3.52	3.52	13.97	90	90	120	P6_3/mmc	Mo	0.27	0.61	0.19
								Te	0.61	0.27	0.32
ZrTe5	4.05	8.18	13.84	90	90	104.33	Cmcm	Te	0.08	0.16	0.65
								Te	0.21	0.43	0.07
								Te	0.33	0.66	0.75
								Zr	0.31	0.63	0.25
GaTe	17.4	4.08	10.46	90	104.5	90	C2/m	Ga	0.14	0	0.42
								Ga	0.24	0	0.3
								Ga	0.56	0	0.08
								Te	0.16	0	0.05
								Te	0.16	0	0.68
								Te	0.54	0	0.33
CdPS3	6.26	10.86	7.06	90	106.77	90	C2/m	Cd	0.5	0.83	0
								P	0.95	0	0.83
								S	0.76	0.16	0.75
								S	0.77	0	0.25
CoPS3	5.81	10.05	6.8	90	106.85	90	C2/m	Co	0.5	0.83	0.5
								P	0.94	0	0.33
								S	0.75	0.82	0.29
								S	0.71	0	0.71
CrPS4	11.41	6.55	7.12	90	89.61	90	C2/m	Cr	0.5	0.7	0
								P	0.3	0	0.13
								S	0.63	0.74	0.75
								S	0.11	0	0.19
								S	0.61	0	0.13
CrSBr	3.42	4.53	9.12	90	90	90	Pmmn	Cr	0.5	0	0.88
								S	0.5	0.5	0.93
								Br	0	0	0.68
CrSeBr	3.31	4.71	9.05	90	90	90	Pmmn	Cr	0.5	0	0.86
								Se	0.5	0.5	0.93
								Br	0	0	0.66
FePS3	5.77	7.4	10	90.02	90	75.38	C2/m	Fe	0.75	0	0.08
								P	0.7	0.15	0.75
								S	0.05	0.19	0.75
								S	0.51	0.19	0.93
InGaSe2	8.16	8.16	6.4	90	90	90	I4/mcm	In	0	0	0.75
								Ga	0.5	0	0.25
								Se	0.66	0.16	0
CdAsS3Na	5.68	16.37	5.73	90	89.29	90	P2_1/c	Cd	1	0.25	0.25
								As	0.49	0.4	0.24
								S	0.03	0.1	0.34
								S	0.09	0.41	0.28
								S	0.03	0.24	0.79
								Na	0.53	0.08	0.27
GaPS4	8.39	7.95	11.99	90	132.78	90	P2_1/c	Ga	0.38	0.46	0.61
								P	0.36	0.26	0.35
								S	0.75	0.52	0.78
								S	0.3	0.73	0.51
								S	0.25	0.23	0.46
								S	0.23	0.05	0.22
Nb2SiTe4	6.38	7.95	15.65	90	106.7	90	P2_1/c	Nb	0.65	0.46	0.25
								Nb	0.85	0.71	0.75
								Si	0.25	0.87	0.75
								Te	0.88	0.52	0.12
								Te	0.62	0.73	0.38
								Te	0.94	0.02	0.12
								Te	0.56	0.23	0.38
NbAs2	9.42	3.41	7.86	90	119.42	90	C2/m	Nb	0.34	0.5	0.8
								As	0.9	0.5	0.11
								As	0.14	0	0.53
NbS3	9.96	3.36	15.04	90	109.85	90	P2_1/m	Nb	0.47	0.25	0.12
								Nb	0.88	0.75	0.21
								Nb	0.16	0.25	0.46
								S	0.27	0.75	0.09
								S	0.33	0.75	0.43
								S	0.32	0.75	0.57
								S	0.43	0.75	0.23
								S	0.62	0.75	0.07
								S	0.9	0.25	0.09
								S	0.08	0.25	0.28
								S	0.72	0.25	0.25
								S	0.96	0.75	0.41
NbTe2	15.2	3.67	9.65	90	112.17	90	C2/m	Nb	0	0	0
								Nb	0.36	0	0.71
								Te	0.35	0	0.98
								Te	0.21	0.5	0.61
								Te	0.01	0	0.3
Bi2Te4Pb	4.48	4.48	43.38	90	90	120	R-3m	Bi	0.33	0.67	0.09
								Te	0	0	0.13
								Te	0	0	0.29
								Pb	0	0	0
Sb2S3	3.88	11.23	11.84	90	90	90	Pnma	Sb	0.75	0.47	0.86
								Sb	0.25	0.17	0.97
								S	0.75	0.06	0.88
								S	0.75	0.38	0.05
								S	0.25	0.19	0.3
SnPSe3	6.99	7.82	12.07	90	124.4	90	P2_1/c	Sn	0.75	0.37	0.79
								P	0.38	0.1	0.43
								Se	0.88	0.01	0.77
								Se	0.4	0.81	0.06
								Se	0.79	0.7	0.97
TaS3	9.91	3.36	14.94	90	109.31	90	P2_1/m	Ta	0.53	0.25	0.88
								Ta	0.88	0.25	0.21
								Ta	0.84	0.25	0.54
								S	0.27	0.25	0.09
								S	0.33	0.25	0.43
								S	0.32	0.25	0.57
								S	0.62	0.25	0.07
								S	0.43	0.25	0.23
								S	0.1	0.25	0.91
								S	0.92	0.25	0.72
								S	0.28	0.25	0.75
								S	0.96	0.25	0.41
TaTe2	15.53	10.92	9.66	90	112.94	90	C2/m	Ta	0.64	0.34	0.29
								Ta	0.36	0	0.71
								Ta	0.5	0.8	0
								Ta	0	0	0
								Te	0.21	0.83	0.62
								Te	0.29	0	0.38
								Te	0.65	0.34	0.02
								Te	0.99	0	0.7
								Te	0.49	0.17	0.7
								Te	0.63	0	0.01
TiS3	4.98	3.41	9.08	90	96.56	90	P2_1/m	Ti	0.72	0.25	0.35
								S	0.11	0.25	0.82
								S	0.48	0.75	0.19
								S	0.76	0.75	0.55
TlInS2	10.95	10.96	15.43	90	100.22	90	C2/c	Tl	0.71	0.06	0.62
								Tl	0.53	0.31	0.89
								In	0.4	0.69	0.84
								In	0.35	0.94	0.66
								S	0.24	0.81	0.75
								S	0.5	0.08	0.75
								S	0.5	0.55	0.75
								S	0.45	0.82	0.55
								S	0.8	0.06	0.94
